# Supplementary material
Source: PubMed Central journal article supplement (PMC4918452)

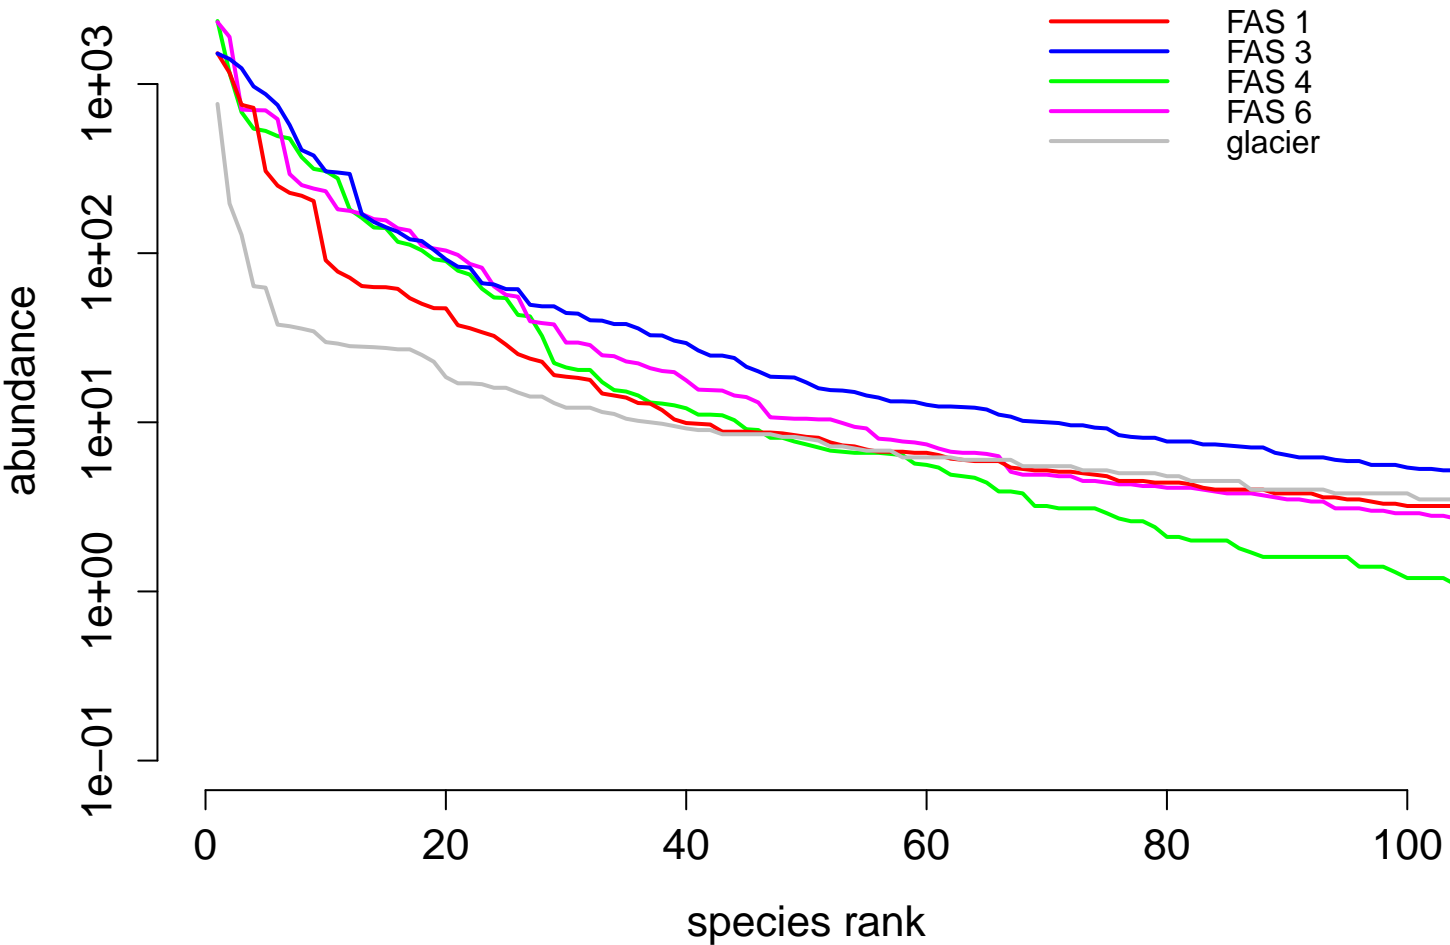

Supplement: ismej2015245x6.pdf [file ismej2015245x6.pdf]
